# Supplementary material for: The Decision-Making Process regarding Ovarian Tissue Cryopreservation in Girls with Turner Syndrome by Patients, Parents, and Healthcare Providers: A Mixed-Methods Study
Source: PubMed Central journal article supplement — Horm Res Paediatr. 2022 Jun 7;95(4):374–83. doi: 10.1159/000525374 (PMC9677842; doi:10.1159/000525374), 2022-06-07
Supplement: hrp-0095-0374-s02.pdf [file hrp-0095-0374-s02.pdf]

**Evaluation of the decision-making process of future parenthood when diagnosed with Turner syndrome**

You recently visited the outpatient clinic for reproductive medicine at Radboudumc to discuss your diagnosis with Turner’s syndrome and the possibilities for future parenthood. With the support of a physician, you have made a choice whether or not to freeze ovarian tissue, or to wait with this decision a little longer. We would like you to share your experiences of this decision-making process with us. That is why we ask you to fill out this questionnaire (together with your parents).

**1.1 What did you think of the general guidance you received during the decision-making process?**

| Especially contributing to existing care | Contributing to existing care | Neutral               | Little contributing to existing care | Not contributing to existing care |
|------------------------------------------|-------------------------------|-----------------------|--------------------------------------|-----------------------------------|
| <input type="radio"/>                    | <input type="radio"/>         | <input type="radio"/> | <input type="radio"/>                | <input type="radio"/>             |

**1.2 Can you please elaborate?**

**2.1 How did you experience the different components during the decision-making process?**

|                                                               | Especially contributing to existing care | Contributing to existing care | Neutral               | Little contributing to existing care | Not contributing to existing care |
|---------------------------------------------------------------|------------------------------------------|-------------------------------|-----------------------|--------------------------------------|-----------------------------------|
| a) I thought the informative meeting was                      | <input type="radio"/>                    | <input type="radio"/>         | <input type="radio"/> | <input type="radio"/>                | <input type="radio"/>             |
| b) I thought the decision aid on the Radboud website was      | <input type="radio"/>                    | <input type="radio"/>         | <input type="radio"/> | <input type="radio"/>                | <input type="radio"/>             |
| c) I thought the personal consultation with the physician was | <input type="radio"/>                    | <input type="radio"/>         | <input type="radio"/> | <input type="radio"/>                | <input type="radio"/>             |

**3.1 Which component was key when it came to making your final decision?**

- The informative meeting
- The decision aid on the Radboud website
- The personal consultation

**3.2 Can you please elaborate?**

**4.1 Did you consult any sources other than those mentioned above during the decision-making process?**

- No
- Yes, namely...

**5.1 Which choice did you make? Please select just one answer.**

- To wait
- To pursue a future wish for children by way of adoption, foster care or egg donation
- To freeze egg cells by way of IVF treatment
- To freeze ovarian tissue for research purposes
- I have not made a choice (as yet)

**6.1 Did you ever receive information about the Turner syndrome and (in)fertility before this counselling process?**

- No
- Yes, namely...

**7.1 Do you think fertility counselling is contributing to the existing care for a girl diagnosed with Turner syndrome?**

- No
- Yes

**7.2 Can you please elaborate?**

**8.1 How difficult was it for you to talk about this subject. Please select an answer below.**

- |                            |                       |                       |
|----------------------------|-----------------------|-----------------------|
| Not<br>difficult at<br>all | Somewhat<br>difficult | Very<br>difficult     |
| <input type="radio"/>      | <input type="radio"/> | <input type="radio"/> |

**8.2 Can you please elaborate?**

**9.1 How did you find out that it was possible to have a counselling?**

- Via my paediatrician
- Via TurnerContact Nederland
- Via the Radboudumc website
- Via a press release
- Via Social Media
- Otherwise, namely

*To conclude, we would like to ask you a few more questions that may have possibly contributed to the selection process.*

**10.1 What is the composition of your family? (number of people, relationship to each other etc.)**

**10.2 Do you have any brothers or sisters?**

- |                           |                        |                      |                           |
|---------------------------|------------------------|----------------------|---------------------------|
| <input type="radio"/> No  |                        |                      |                           |
| <input type="radio"/> Yes | Number of<br>brothers: | <input type="text"/> | Age: <input type="text"/> |
|                           | Number of<br>sisters:  | <input type="text"/> | Age: <input type="text"/> |

**10.2.1 If the answer is yes, are they healthy or do they have a chronic illness?**

**10.3 Are you currently in a relationship?**

- No
- Yes
- Does not apply

**10.4 What is your father's highest level of education?**

- Elementary school
- Preparatory secondary vocational education
- Higher general secondary education
- Secondary vocational education
- Higher professional education
- University education

**10.5 What is your mother's highest level of education?**

- Elementary school
- Preparatory secondary vocational education
- Higher general secondary education
- Secondary vocational education
- Higher professional education
- University education

**10.6 Have your parents gone through fertility treatment?**

- No
- Yes, namely...

**11.1 Do you have any suggestions for improvement?**

**11.2 Would you like to add anything?**

Please do not forget to enclose the consent form. Thank you for completing the questionnaire.
