# Supplementary material for: The Decision-Making Process regarding Ovarian Tissue Cryopreservation in Girls with Turner Syndrome by Patients, Parents, and Healthcare Providers: A Mixed-Methods Study
Source: PubMed Central journal article supplement — Horm Res Paediatr. 2022 Jun 7;95(4):374–83. doi: 10.1159/000525374 (PMC9677842; doi:10.1159/000525374), 2022-06-07

**Additional file 3.** Survey response of families who visited the informative meeting on fertility preservation in TS and alternative options for parenthood (adoption, foster care, oocyte donation)

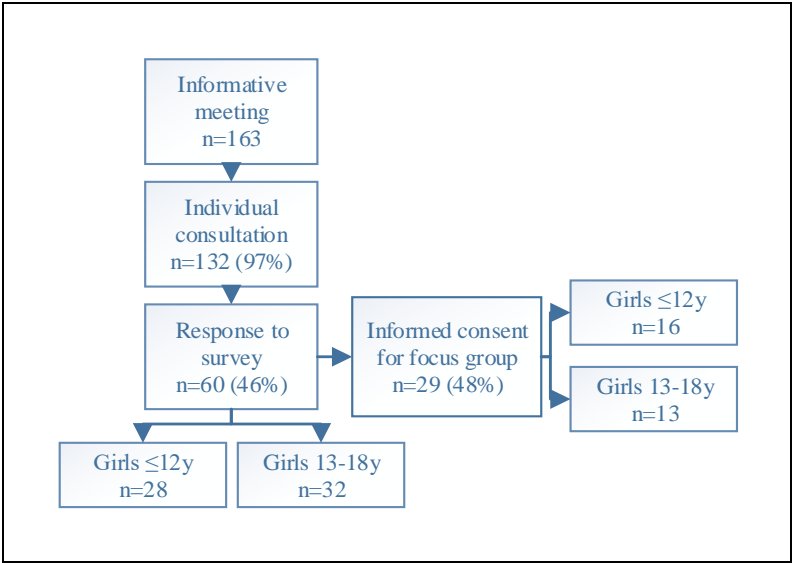

Supplement: hrp-0095-0374-s03.pdf [file hrp-0095-0374-s03.pdf]
